# Supplementary material for: Attitudes Toward HPV Vaccination in Sweden: A Survey Study
Source: PubMed Central journal article supplement (PMC9127737; doi:10.3389/fpubh.2022.729497), 2022-05-10
Supplement: Data_Sheet_1.pdf [file Data_Sheet_1.pdf]

# Kvinnors uppfattningar om kopparspiral och HPV-vaccin

Välkommen till en mätning från SIFO.

Vi är intresserade av att höra just DIN åsikt om följande frågor. Tänk på att det inte finns något rätt eller fel svar.

Vi är intresserade av dina spontana svar på frågorna, så fastna alltså inte alltför länge på någon fråga.

Denna undersökning genomförs på uppdrag av Lunds Universitet. Mer information om studien hittar du [här](#).

Denna undersökning vänder sig till kvinnor. För att försäkra oss om att du ingår i målgruppen frågar vi dig: Vilken är din könsidentitet?

|                                           |
|-------------------------------------------|
| <input type="radio"/> Kvinna              |
| <input type="radio"/> Man                 |
| <input type="radio"/> Annan könsidentitet |

Vad har du för högsta avslutade utbildningsnivå?

|                                                                                                      |
|------------------------------------------------------------------------------------------------------|
| <input type="radio"/> Grundskola (el. motsvarande)                                                   |
| <input type="radio"/> Gymnasium (el. motsvarande)                                                    |
| <input type="radio"/> Högskola, universitet eller annan eftergymnasial utbildning (ex. folkhögskola) |
| <input type="radio"/> Forskarutbildning                                                              |
| <input type="radio"/> Saknar fullföljd utbildning                                                    |
| <input type="radio"/> Vill ej svara                                                                  |
| <input type="radio"/> Tveksam, vet ej                                                                |

Var är du själv, din mor och din far födda? I Sverige eller i något annat land?

|           | Född i Sverige        | Född i övriga Norden  | Född i övriga Europa  | Född utanför Europa   | Vill ej svara         |
|-----------|-----------------------|-----------------------|-----------------------|-----------------------|-----------------------|
| Jag själv | <input type="radio"/> | <input type="radio"/> | <input type="radio"/> | <input type="radio"/> | <input type="radio"/> |
| Min mor   | <input type="radio"/> | <input type="radio"/> | <input type="radio"/> | <input type="radio"/> | <input type="radio"/> |
| Min far   | <input type="radio"/> | <input type="radio"/> | <input type="radio"/> | <input type="radio"/> | <input type="radio"/> |

Har du några barn, oavsett hur gamla de är?

|                                                    |
|----------------------------------------------------|
| <input type="radio"/> Ja, som bor hos mig          |
| <input type="radio"/> Ja, som bor växelvis hos mig |
| <input type="radio"/> Ja, som inte bor hos mig     |
| <input type="radio"/> Nej, jag har inga barn       |
| <input type="radio"/> Vill ej svara                |

Hur stor är din personliga månadsinkomst?

Med inkomst menar vi inkomst före skatt. Studiemedel, hyresbidrag, pensioner mm räknas också som inkomst.

|                                                     |
|-----------------------------------------------------|
| <input type="radio"/> Mindre än 13 999 kronor/månad |
| <input type="radio"/> 14 000 - 24 999 kronor/månad  |
| <input type="radio"/> 25 000 - 41 999 kronor/månad  |
| <input type="radio"/> Mer än 41 999 kronor/månad    |
| <input type="radio"/> Tveksam, vet ej               |
| <input type="radio"/> Vill ej svara                 |

**Hur stort eller litet förtroende har du för följande institutioner/grupper i samhället?**

|                   | Mycket stort förtroende | Ganska stort förtroende | Ganska litet förtroende | Mycket litet förtroende | Tveksam, vet ej       | Vill ej svara         |
|-------------------|-------------------------|-------------------------|-------------------------|-------------------------|-----------------------|-----------------------|
| Sjukvården        | <input type="radio"/>   | <input type="radio"/>   | <input type="radio"/>   | <input type="radio"/>   | <input type="radio"/> | <input type="radio"/> |
| Skolan            | <input type="radio"/>   | <input type="radio"/>   | <input type="radio"/>   | <input type="radio"/>   | <input type="radio"/> | <input type="radio"/> |
| Polisen           | <input type="radio"/>   | <input type="radio"/>   | <input type="radio"/>   | <input type="radio"/>   | <input type="radio"/> | <input type="radio"/> |
| Försäkringskassan | <input type="radio"/>   | <input type="radio"/>   | <input type="radio"/>   | <input type="radio"/>   | <input type="radio"/> | <input type="radio"/> |
| Politiker         | <input type="radio"/>   | <input type="radio"/>   | <input type="radio"/>   | <input type="radio"/>   | <input type="radio"/> | <input type="radio"/> |
| Forskare          | <input type="radio"/>   | <input type="radio"/>   | <input type="radio"/>   | <input type="radio"/>   | <input type="radio"/> | <input type="radio"/> |

**Vad har du för inställning till vaccin i allmänhet?**

Mycket positiv

Ganska positiv

Ganska negativ

Mycket negativ

Tveksam, vet ej

Vill ej svara

**I vilken mån håller du med om följande påstående?**

**Det är generellt sett viktigt för mig att vara källkritisk och ta reda på var hälsorelaterad information kommer ifrån**

Instämmer i mycket hög grad/helt och hållet

Instämmer i ganska hög grad

Instämmer i ganska låg grad

Instämmer i mycket låg grad/inte alls

Tveksam, vet ej

Vill ej svara

## HPV-vaccin

**HPV-vaccin (Gardasil) ges för att förebygga livmoderhalscancer och erbjuds alla barn i årskurs 5 inom det allmänna vaccinationsprogrammet.**

**Har du själv blivit vaccinerad mot HPV?**

Ja, jag har tagit emot HPV-vaccin

Nej, jag har inte tagit emot HPV-vaccin

Tveksam, vet ej

Vill ej svara

**Om du har, eller skulle ha en flicka som erbjuds HPV-vaccin, hur sannolikt bedömer du att det är att du skulle låta barnet bli vaccinerat?**

Mycket sannolikt

Ganska sannolikt

Ganska osannolikt

Mycket osannolikt

Tveksam, vet ej

Vill ej svara

Om du har, eller skulle ha en pojke som erbjuds HPV-vaccin, hur sannolikt bedömer du att det är att du skulle låta barnet bli vaccinerat?

|                   |
|-------------------|
| Mycket sannolikt  |
| Ganska sannolikt  |
| Ganska osannolikt |
| Mycket osannolikt |
| Tveksam, vet ej   |
| Vill ej svara     |

Om du tänker på kvinnor i allmänhet, i vilken mån håller du med om följande påståenden?

|                                                                           | Instämmer i<br>mycket hög<br>grad/helt och<br>hållet | Instämmer i<br>ganska hög<br>grad | Instämmer i<br>ganska låg<br>grad | Instämmer i<br>mycket låg<br>grad/inte alls | Tveksam,<br>vet ej    | Vill ej svara         |
|---------------------------------------------------------------------------|------------------------------------------------------|-----------------------------------|-----------------------------------|---------------------------------------------|-----------------------|-----------------------|
| HPV-vaccin fyller en viktig funktion för att förhindra livmoderhalscancer | <input type="radio"/>                                | <input type="radio"/>             | <input type="radio"/>             | <input type="radio"/>                       | <input type="radio"/> | <input type="radio"/> |
| HPV-vaccin utgör ett effektivt skydd mot livmoderhalscancer               | <input type="radio"/>                                | <input type="radio"/>             | <input type="radio"/>             | <input type="radio"/>                       | <input type="radio"/> | <input type="radio"/> |
| Biverkningar av HPV-vaccinets risker och biverkningar är ovanliga         | <input type="radio"/>                                | <input type="radio"/>             | <input type="radio"/>             | <input type="radio"/>                       | <input type="radio"/> | <input type="radio"/> |
| Biverkningar av HPV-vaccinets risker och biverkningar är milda            | <input type="radio"/>                                | <input type="radio"/>             | <input type="radio"/>             | <input type="radio"/>                       | <input type="radio"/> | <input type="radio"/> |
| HPV-vaccinets nytta överväger dess eventuella risker                      | <input type="radio"/>                                | <input type="radio"/>             | <input type="radio"/>             | <input type="radio"/>                       | <input type="radio"/> | <input type="radio"/> |

Har du haft kontakt med vårdpersonal (t ex läkare, skolsköterska eller barnmorska) om HPV- vaccin?

Med kontakt menar vi att du antingen kontaktat vården enbart i syfte att prata om HPV-vaccin eller att du vaccinerat dig med HPV-vaccin, alternativt att HPV-vaccin kommit på tal i samband med annat ärende.

|                 |
|-----------------|
| Ja              |
| Nej             |
| Tveksam, vet ej |
| Vill ej svara   |

Om Ja:

I vilken grad är du nöjd med vårdpersonalens bemötande när du pratat med dem om HPV-vaccin?

|                 |
|-----------------|
| Mycket nöjd     |
| Ganska nöjd     |
| Ganska missnöjd |
| Mycket missnöjd |
| Tveksam, vet ej |
| Vill ej svara   |

**I vilken grad bedömer du att följande informationskällor är pålitliga eller opålitliga gällande HPV-vaccin?**

|                                                                                                                   | Mycket pålitlig       | Ganska pålitlig       | Ganska opålitlig      | Mycket opålitlig      | Tveksam, vet ej       | Vill ej svara         |
|-------------------------------------------------------------------------------------------------------------------|-----------------------|-----------------------|-----------------------|-----------------------|-----------------------|-----------------------|
| Skolsköterska, läkare eller annan vårdpersonal (inkl 1177, vård via digitala appar från legitimerad vårdpersonal) | <input type="radio"/> | <input type="radio"/> | <input type="radio"/> | <input type="radio"/> | <input type="radio"/> | <input type="radio"/> |
| Läkemedelsverket, Socialstyrelsen eller annan offentlig (vård)institution (utöver läkare och annan vårdpersonal)  | <input type="radio"/> | <input type="radio"/> | <input type="radio"/> | <input type="radio"/> | <input type="radio"/> | <input type="radio"/> |
| Alternativ- eller komplementärmedicinska utövare eller texter                                                     | <input type="radio"/> | <input type="radio"/> | <input type="radio"/> | <input type="radio"/> | <input type="radio"/> | <input type="radio"/> |
| Facebook, Youtube, bloggar eller andra sociala medier                                                             | <input type="radio"/> | <input type="radio"/> | <input type="radio"/> | <input type="radio"/> | <input type="radio"/> | <input type="radio"/> |
| Personer du mött, som berättat om sina erfarenheter eller perspektiv                                              | <input type="radio"/> | <input type="radio"/> | <input type="radio"/> | <input type="radio"/> | <input type="radio"/> | <input type="radio"/> |
| Egna erfarenheter                                                                                                 | <input type="radio"/> | <input type="radio"/> | <input type="radio"/> | <input type="radio"/> | <input type="radio"/> | <input type="radio"/> |

**I vilken mån håller du med om följande påståenden?**

|                                                                                                          | Instämmer i mycket hög grad/helt och hållet | Instämmer i ganska hög grad | Instämmer i ganska låg grad | Instämmer i mycket låg grad/inte alls | Tveksam, vet ej       | Jag har inte behövt eller eftersökt information om HPV-vaccin | Vill ej svara         |
|----------------------------------------------------------------------------------------------------------|---------------------------------------------|-----------------------------|-----------------------------|---------------------------------------|-----------------------|---------------------------------------------------------------|-----------------------|
| Jag har haft tillgång till den information jag behövt om HPV-vaccin                                      | <input type="radio"/>                       | <input type="radio"/>       | <input type="radio"/>       | <input type="radio"/>                 | <input type="radio"/> | <input type="radio"/>                                         | <input type="radio"/> |
| Jag tycker att det är lätt att urskilja var information om HPV-vaccin kommer ifrån                       | <input type="radio"/>                       | <input type="radio"/>       | <input type="radio"/>       | <input type="radio"/>                 | <input type="radio"/> | <input type="radio"/>                                         | <input type="radio"/> |
| Jag har förmåga att bedöma kvaliteten och tillförlitligheten hos olika sorters information om HPV-vaccin | <input type="radio"/>                       | <input type="radio"/>       | <input type="radio"/>       | <input type="radio"/>                 | <input type="radio"/> | <input type="radio"/>                                         | <input type="radio"/> |

**Har du tagit del av information eller berättelser om risker förknippade med HPV-vaccin via sociala medier (t ex Facebook, youtube eller bloggar)?**

Du kan markera fler än ett svarsalternativ

- Ja, information från sjukvård eller annan offentlig vårdinstitution
- Ja, information från alternativ- eller komplementärmedicinsk källa
- Ja, privatpersoners erfarenheter eller perspektiv
- Nej, aldrig
- Tveksam, vet ej
- Vill ej svara

**Vill du tillägga något om HPV-vaccinet?**

Utifrån egna erfarenheter eller mer generella tankar.
